# Supplementary material
Source: PubMed Central journal article supplement (PMC3918579)
Supplement: NIHMS56322-supplement-Suppl.pdf [file NIHMS56322-supplement-Suppl.pdf]

1  
2  
3  
4  
5  
6  
7  
8  
9  
10  
11  
12  
13  
14  
15  
16  
17  
18  
19  
20  
21  
22  
23  
24  
25  
26  
27  
28  
29  
30  
31  
32  
33  
34  
35  
36  
37  
38  
39  
40  
41  
42  
43  
44  
45  
46  
47  
48  
49  
50  
51  
52  
53  
54  
55  
56  
57  
58  
59  
60  
61  
62  
63  
64  
65

## Supplementary Material

### **Immunosuppressive activity of an aqueous *Viola tricolor* herbal extract**

Roland Hellinger<sup>2,#</sup>, Johannes Köhbach<sup>2,#</sup>, Halyna Fedchuk<sup>1,#</sup>, Barbara Sauer<sup>1</sup>,  
Roman Huber<sup>1</sup>, Christian W. Gruber<sup>2</sup> and Carsten Gründemann<sup>1\*</sup>

<sup>1</sup>Egpgvt " hqt" Eqo r rgo gpvt {" O gf lekg." F gr ctvo gpv' qh' Gpxktqpo gpvri' J gcnj " Uekpegu."

Wpkxgtuk {"O gf lecn'Egpgvt'Ht gldwti ."Dt gkucej gt"Ut0337D.'9; 328'Ht gldwti ."I gto cp {"

<sup>2</sup>Egpgvt " hqt" Rj {ukqmi {" cpf " Rj cto ceqmi {" O gf lecn' Wpkxgtuk {" qh' Xkgppc."

Uej y ct| ur cplgtutcuug"39."32; 2"Xkgppc.'Cwutk"

#contributed equally to this work



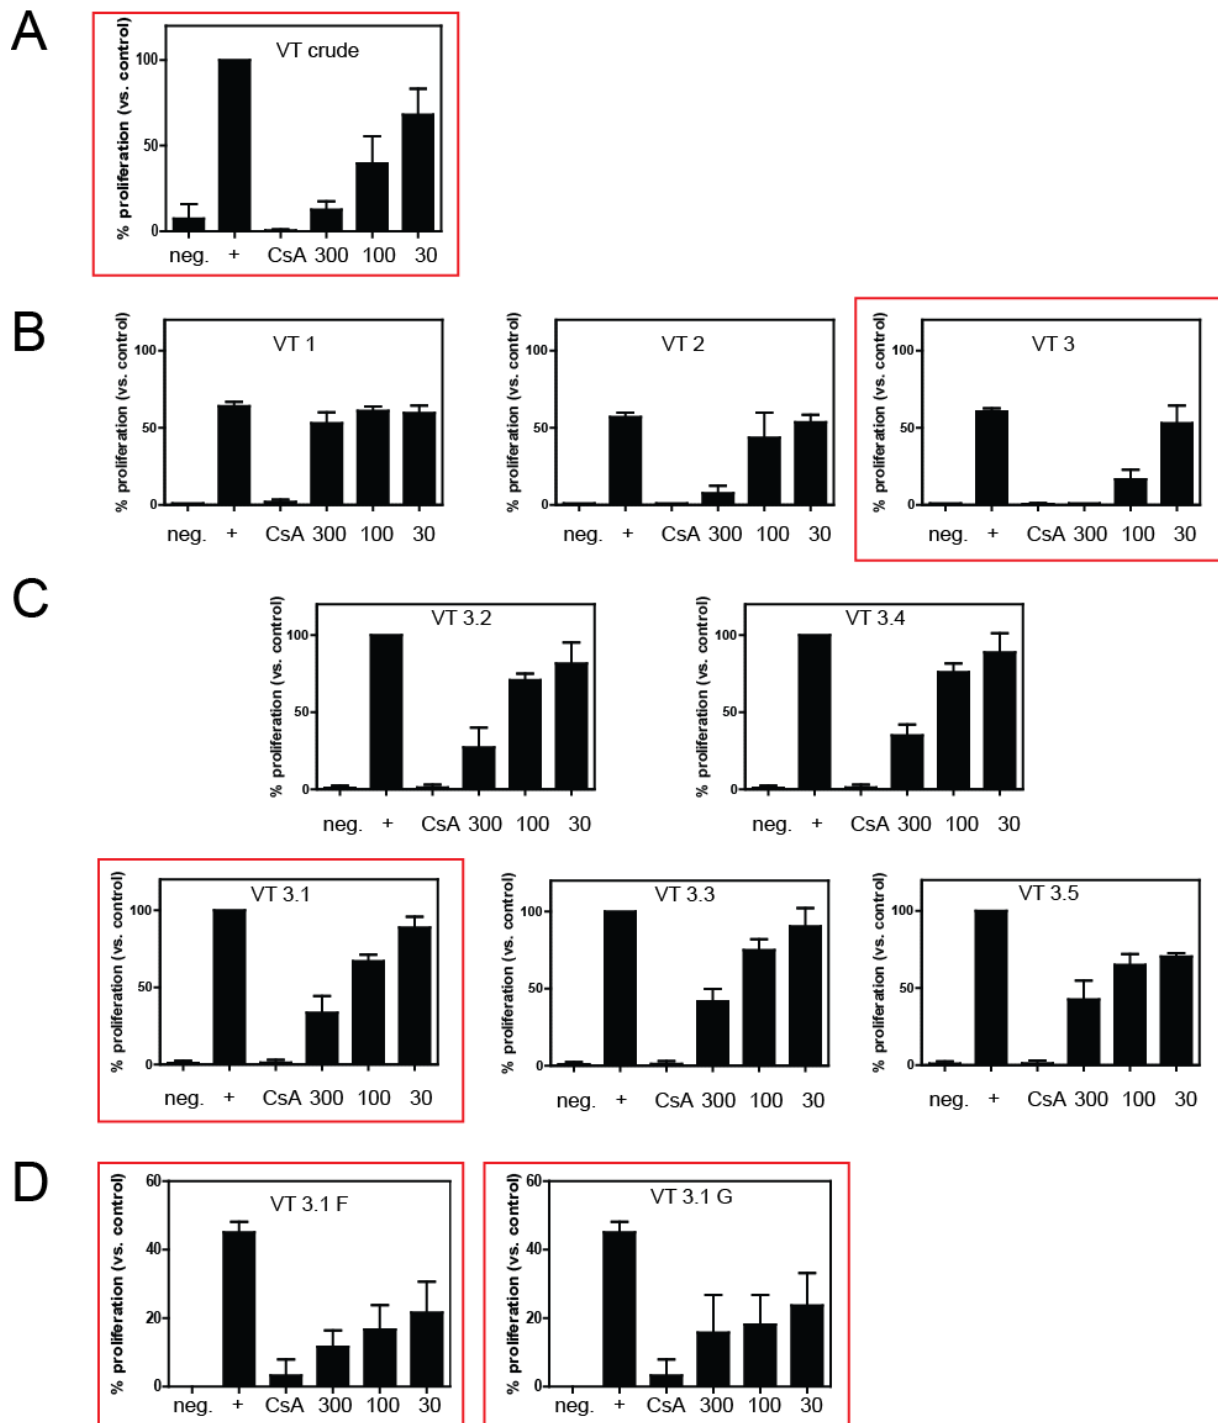

**Supplementary Figure 2: Influence of all tested *Viola tricolor* fractions on the proliferation of activated human T-lymphocytes.** (A) According to the bioactivity guided fractionation approach, all extracts and chromatographed fractions were applied to a proliferation assay as described in the material and method section. (B-C) Subsequently the most active fraction of each stage was subjected to further chromatographic sub-fractionation to yield highly enriched cyclotides in fraction VT3.1.F and VT3.1.G (D).
